# Supplementary material
Source: MDPI journal article supplement (https://www.mdpi.com/2073-4441/14/2/194)
Supplement: s1 [file s1]

# Multi-Model Assessment of Streamflow Simulations under Climate and Anthropogenic Changes Exemplified in Two Indian River Basins

Anusha Somisetty <sup>1,†</sup>, Akshay Pachore <sup>1,†</sup>, Renji Remesan <sup>1,\*</sup> and Rohini Kumar <sup>2,\*</sup>

## SUPPLEMENTARY MATERIAL

**Table S1.** Ensemble median (25 member and 3 member) of relative change (%) in high flow (Q10) and low flow (Q90) during historical period due to human action (refer equation 2) and during future timeslices due to climate change (refer equation 1) under RCP2.6 and RCP8.5. for the Ganges basin.

| Ganga River Flow index | Seasons     | Ensemble Median                                                                | Hist. | RCP2.6 Scenario |       |       | RCP8.5 Scenario |       |       |
|------------------------|-------------|--------------------------------------------------------------------------------|-------|-----------------|-------|-------|-----------------|-------|-------|
|                        |             |                                                                                |       | NF              | MF    | FF    | NF              | MF    | FF    |
| Q10                    | Pre-Monsoon | 25 members of [GCM-GHM]                                                        | 31.45 | 12.10           | 16.38 | 6.82  | 10.51           | 8.90  | 13.98 |
|                        | Monsoon     |                                                                                | 2.95  | 13.63           | 13.93 | 20.70 | 15.81           | 19.05 | 24.45 |
|                        | Postmonsoon |                                                                                | 4.40  | 6.149           | 9.09  | 9.02  | 7.94            | 10.53 | 22.84 |
|                        | Pre-Monsoon | 3 members WaterGAP-NorESM1-M, WaterGAP-MIROC-ESM-Chem, and WaterGAP-HADGEM2-ES | 25.78 | 12.10           | 8.44  | 5.39  | 14.22           | 10.40 | 8.15  |
|                        | Monsoon     |                                                                                | 7.63  | 13.24           | 13.61 | 27.75 | 12.85           | 39.91 | 41.12 |
|                        | Postmonsoon |                                                                                | 18.94 | 6.95            | 12.22 | 15.00 | 13.16           | 12.05 | 26.69 |
| Q90                    | Pre-Monsoon | 25 members of [GCM-GHM]                                                        | 51.25 | 13.40           | 11.73 | 9.01  | 11.72           | 11.06 | 15.09 |
|                        | Monsoon     |                                                                                | 7.83  | 22.29           | 13.93 | 19.64 | 11.37           | 25.35 | 23.56 |
|                        | Postmonsoon |                                                                                | 9.00  | 16.60           | 21.29 | 26.02 | 27.84           | 27.54 | 34.43 |
|                        | Pre-Monsoon | 3 members WaterGAP-NorESM1-M, WaterGAP-MIROC-ESM-Chem, and WaterGAP-HADGEM2-ES | 46.05 | 15.28           | 3.56  | 13.71 | 10.047          | 8.54  | 3.85  |
|                        | Monsoon     |                                                                                | 7.83  | 8.70            | 17.23 | 17.38 | 10.18           | 26.41 | 27.91 |
|                        | Postmonsoon |                                                                                | 32.39 | 7.55            | 6.55  | 16.48 | 19.25           | 23.60 | 27.82 |

Footnote: Hist.: Historical period [1971-2000], NF: Near Future period [2010-39], MF: Mid Future period (2040-69), FF: Far Future period (2070-99).

**Table S2.** Ensemble median (25 member and 3 member) of relative change (%) in high flow (Q10) and low flow (Q90) during historical period due to human action (refer equation 2) and during future time slices due to climate change (refer equation 1) under RCP2.6 and RCP8.5 for the Godavari basin.

| Godavari<br>River Flow<br>index | Seasons     | Ensemble<br>Median                                                                                                      | Hist. | RCP2.6 Scenario |       |       | RCP8.5 Scenario |       |       |
|---------------------------------|-------------|-------------------------------------------------------------------------------------------------------------------------|-------|-----------------|-------|-------|-----------------|-------|-------|
|                                 |             |                                                                                                                         |       | NF              | MF    | FF    | NF              | MF    | FF    |
| Q10                             | Pre-Monsoon | 25 members<br>of [GCM-<br>GHM]                                                                                          | 19.91 | 21.64           | 21.25 | 15.21 | 18.44           | 20.29 | 32.14 |
|                                 | Monsoon     |                                                                                                                         | 3.16  | 13.86           | 10.73 | 16.34 | 15.09           | 27.92 | 50.18 |
|                                 | Postmonsoon |                                                                                                                         | 3.14  | 17.26           | 17.62 | 7.36  | 11.44           | 26.58 | 22.44 |
|                                 | Pre-Monsoon | 3 members<br>WaterGAP -<br>IPSL-<br>CM5A-LR,<br>WaterGAP -<br>MIROC-<br>ESM-Chem,<br>and<br>WaterGAP -<br>NorESM1-<br>M | 24.24 | 4.81            | 2.37  | 1.98  | 7.504           | 7.29  | 3.47  |
|                                 | Monsoon     |                                                                                                                         | 3.84  | 14.169          | 10.73 | 3.50  | 7.98            | 9.00  | 3.98  |
|                                 | Postmonsoon |                                                                                                                         | 13.84 | 10.87           | 4.19  | 3.85  | 7.06            | 19.94 | 4.61  |
| Q90                             | Pre-Monsoon | 25 members<br>of [GCM-<br>GHM]                                                                                          | 36.82 | 20.78           | 21.42 | 28.80 | 15.31           | 20.91 | 31.35 |
|                                 | Monsoon     |                                                                                                                         | 7.00  | 12.010          | 16.72 | 22.25 | 11.88           | 17.66 | 18.58 |
|                                 | Postmonsoon |                                                                                                                         | 11.93 | 22.05           | 14.54 | 10.18 | 10.71           | 14.15 | 24.31 |
|                                 | Pre-Monsoon | 3 members<br>WaterGAP -<br>IPSL-<br>CM5A-LR,<br>WaterGAP -<br>MIROC-<br>ESM-Chem,<br>and<br>WaterGAP -<br>NorESM1-<br>M | 25.03 | 16.51           | 7.22  | 15.04 | 6.81            | 5.28  | 6.49  |
|                                 | Monsoon     |                                                                                                                         | 7.38  | 5.97            | 10.80 | 20.88 | 3.86            | 15.83 | 12.86 |
|                                 | Postmonsoon |                                                                                                                         | 24.84 | 22.66           | 11.24 | 11.03 | 1.73            | 6.359 | 10.32 |

Footnote: Hist.: Historical period [1971-2000], NF: Near Future period [2010-39], MF: Mid Future period (2040-69), FF: Far Future period (2070-99).
